# Supplementary material
Source: PubMed Central journal article supplement (PMC9949386)

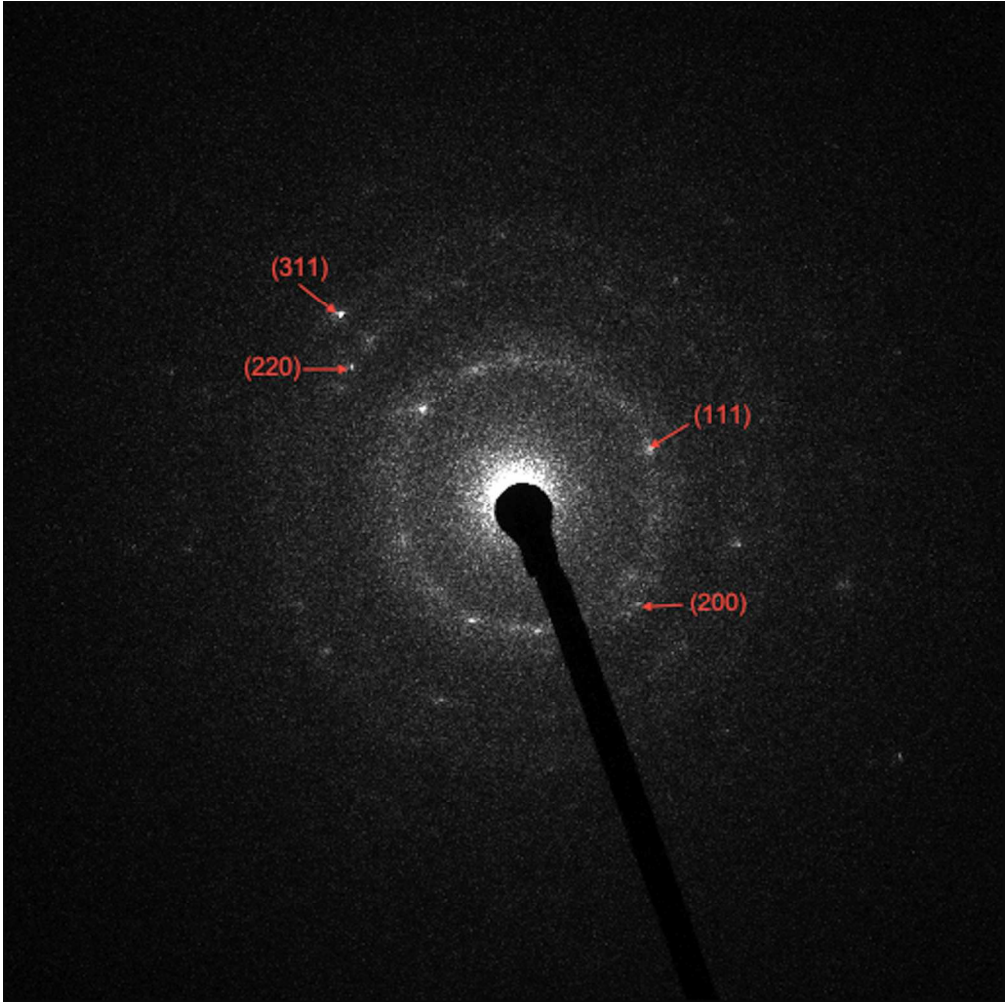

82x82mm (400 x 400 DPI)

Supplement: NIHMS368203-supplement-2_si_002.pdf [file NIHMS368203-supplement-2_si_002.pdf]
